# Supplementary material for: Fracture biomechanics influence local and systemic immune responses in a murine fracture-related infection model
Source: Oxford University Press journal article supplement (doi:10.1242/bio.057315), 2021-07-09
Supplement: bio057315supp.pdf [file bio057315supp.pdf]

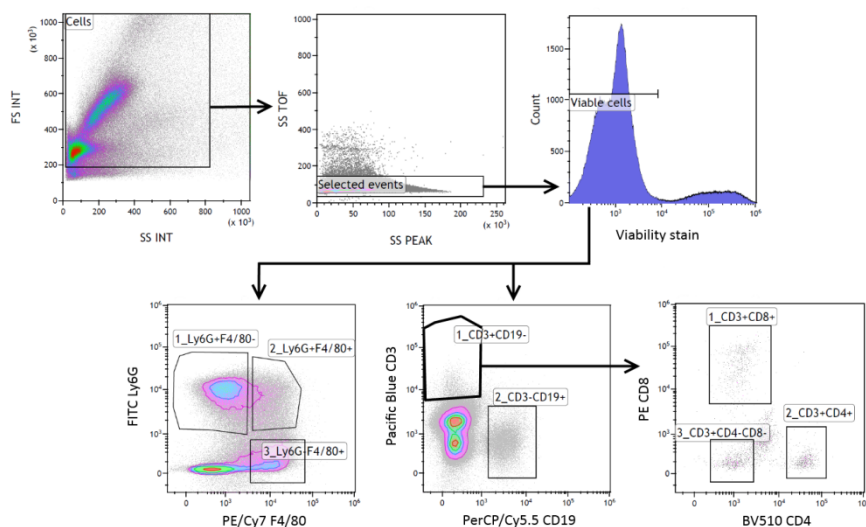

**Fig. S1. Flow cytometry gating strategy of bone single cell suspensions.** Cells were stained with viability dye and the antibodies listed in the Bone panel shown in supplementary Table 5. Upon selection of cells, doublets were excluded as well as dead cells before gating for the different surface markers.

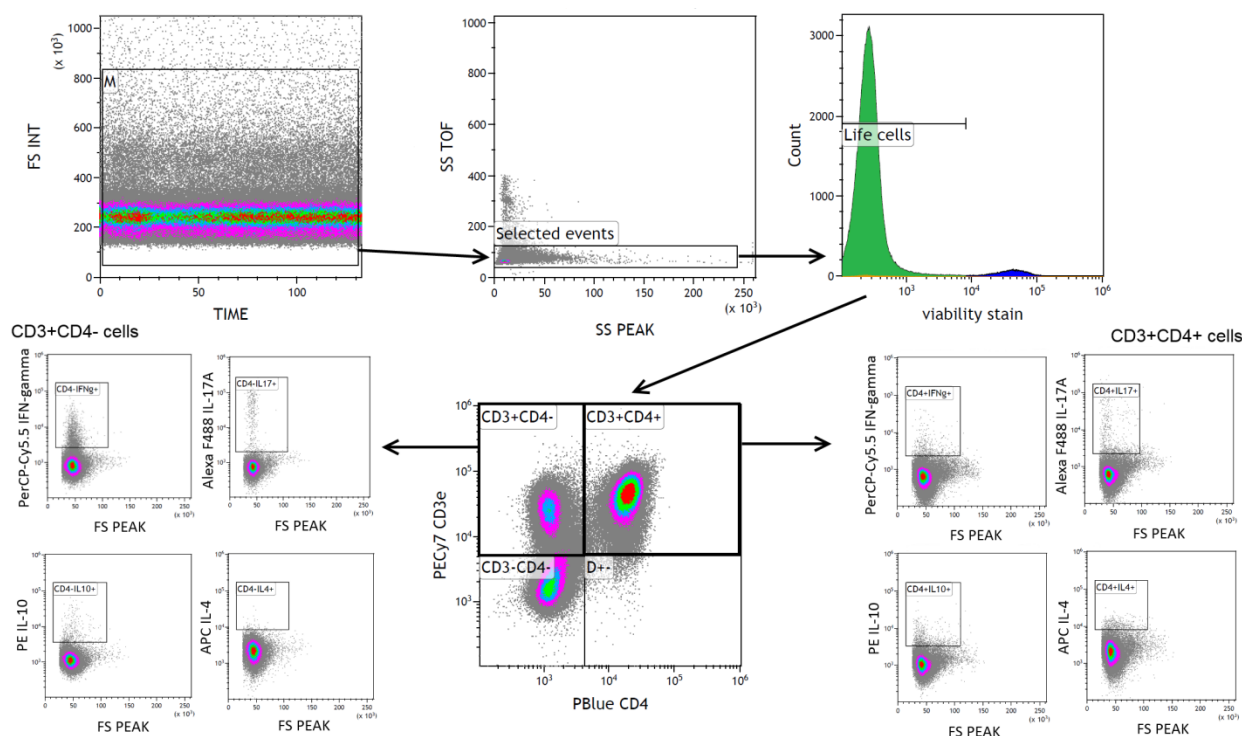

**Fig. S2. Flow cytometry gating strategy of popliteal lymph node single cell suspensions.** Cells were stained with viability dye and the antibodies listed in the Lymph Node panel shown in supplementary Table 5. Upon selection of cells, doublets and dead cell were excluded.

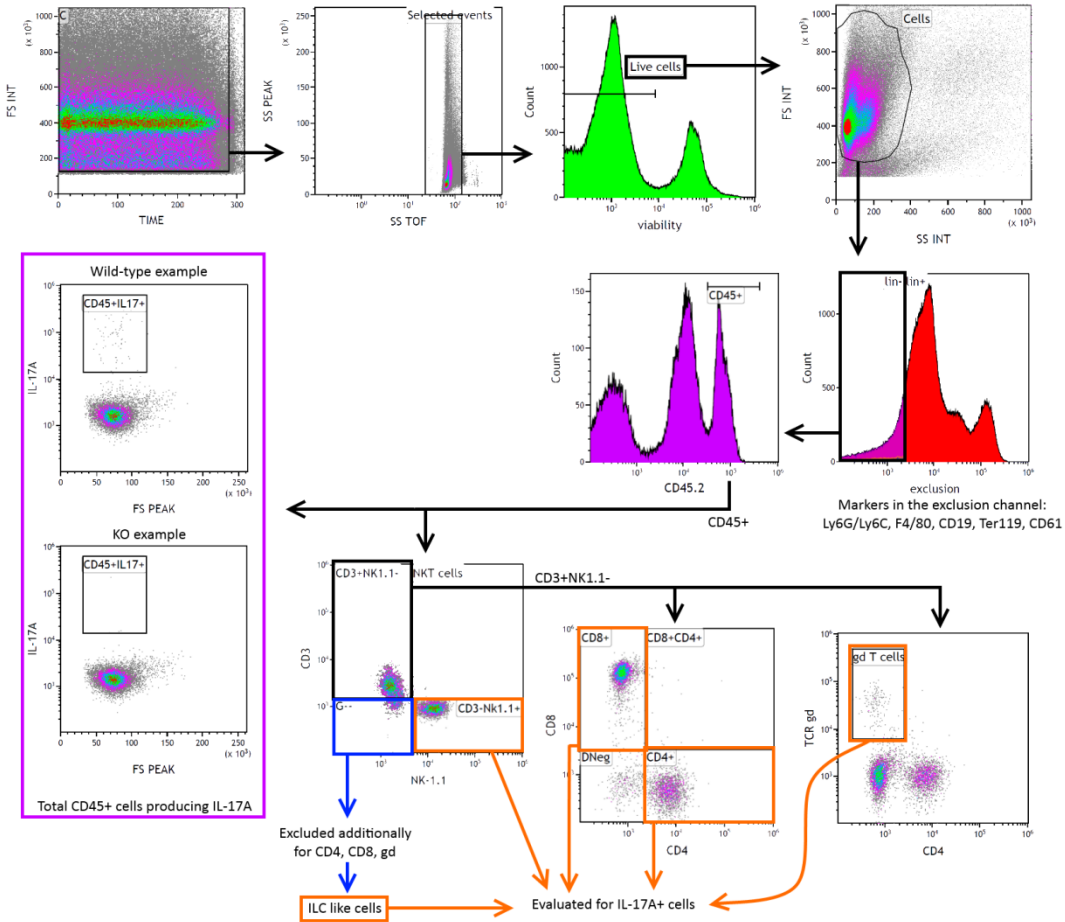

**Fig. S3. Flow cytometry gating strategy of bone single cell suspensions.** Cells were stained with viability dye and the antibodies listed in the IL-17A Bone panel shown in supplementary Table 5.

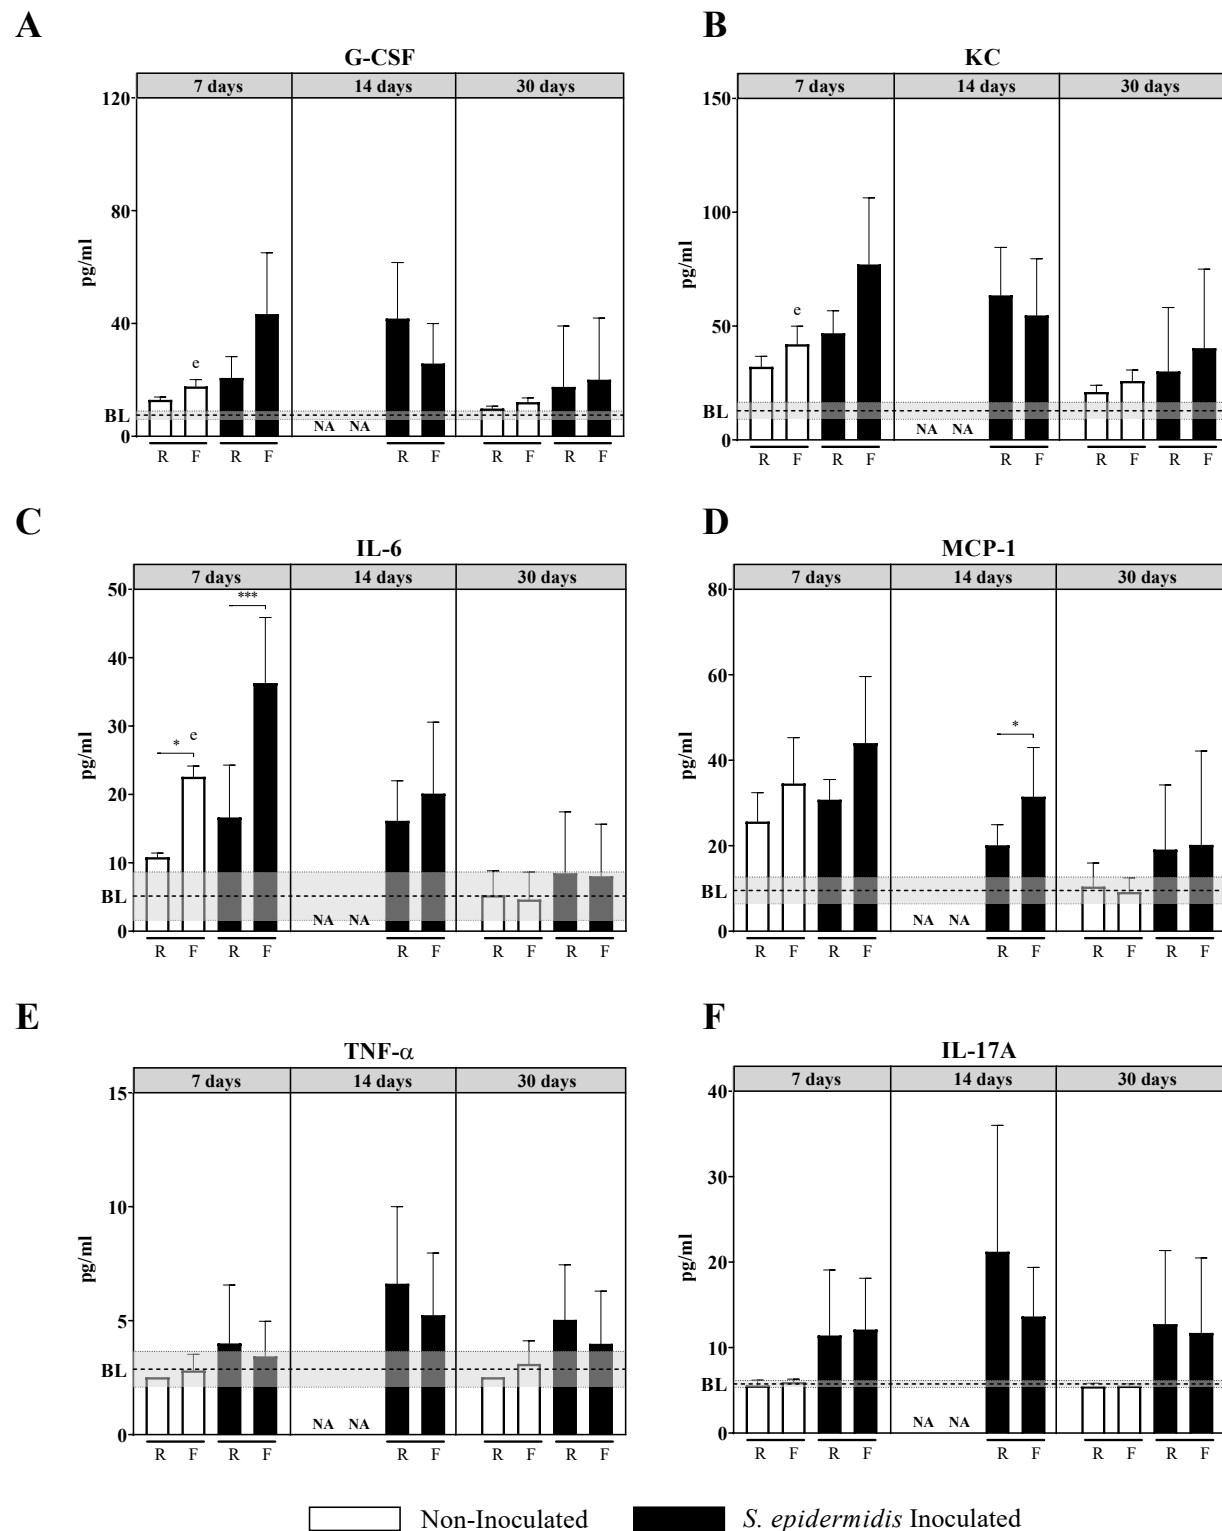

**Fig. S4. Cytokine levels (pg/ml) in bone homogenate supernatants of BALB/c mice at 7, 14 and 30 days post-op.** Data shown are Mean±SD (n=3-7). BL: baseline, mean of the control group (non-operated mice); grey area: BL ±SD of the control group. 2-way ANOVA per time point with Tukey post-hoc correction. Statistics summarize significant differences in the following comparisons: e) Non-inoculated vs *S. epidermidis* Inoculated; Rigid vs Flexible implant within each condition: \*  $P < 0.05$ ; \*\*  $P < 0.01$ , \*\*\*  $P < 0.001$ . R: rigid implant; F: flexible implant, NA: Not available.

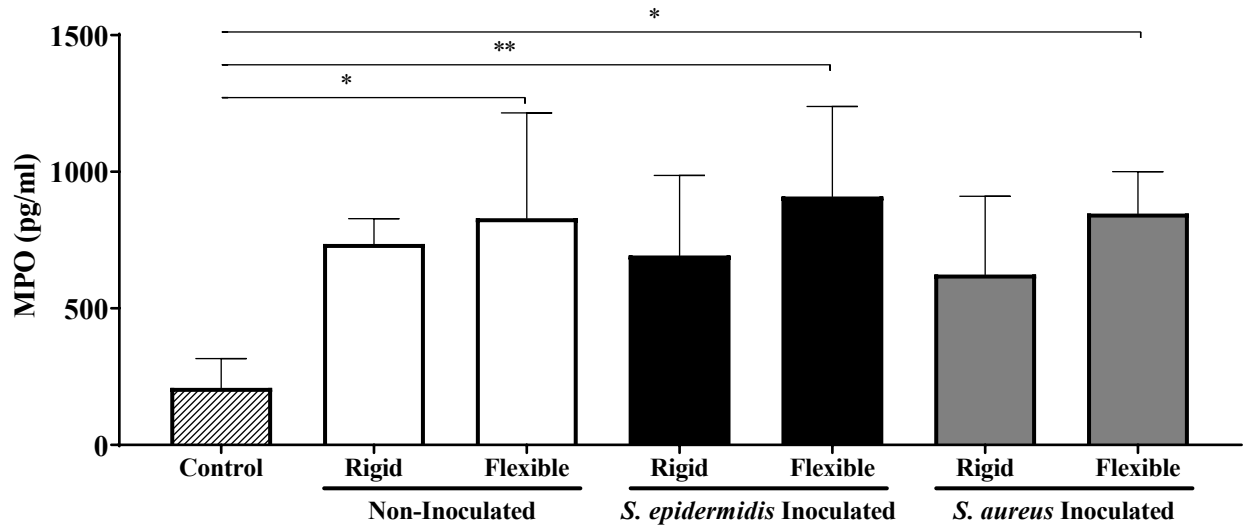

**Fig. S5. MPO levels at day 3 post-op in bone homogenate supernatants.** Mean values and SD (n=4-7). Control: contralateral femurs. 2-way ANOVA with Sidak post-hoc for comparison between different conditions (type of implant and infection status), Kruskal-Wallis test with Dunn's post-hoc for comparison of all conditions with the control group (non-operated): \*  $P < 0.05$ ; \*\*  $P < 0.01$ .

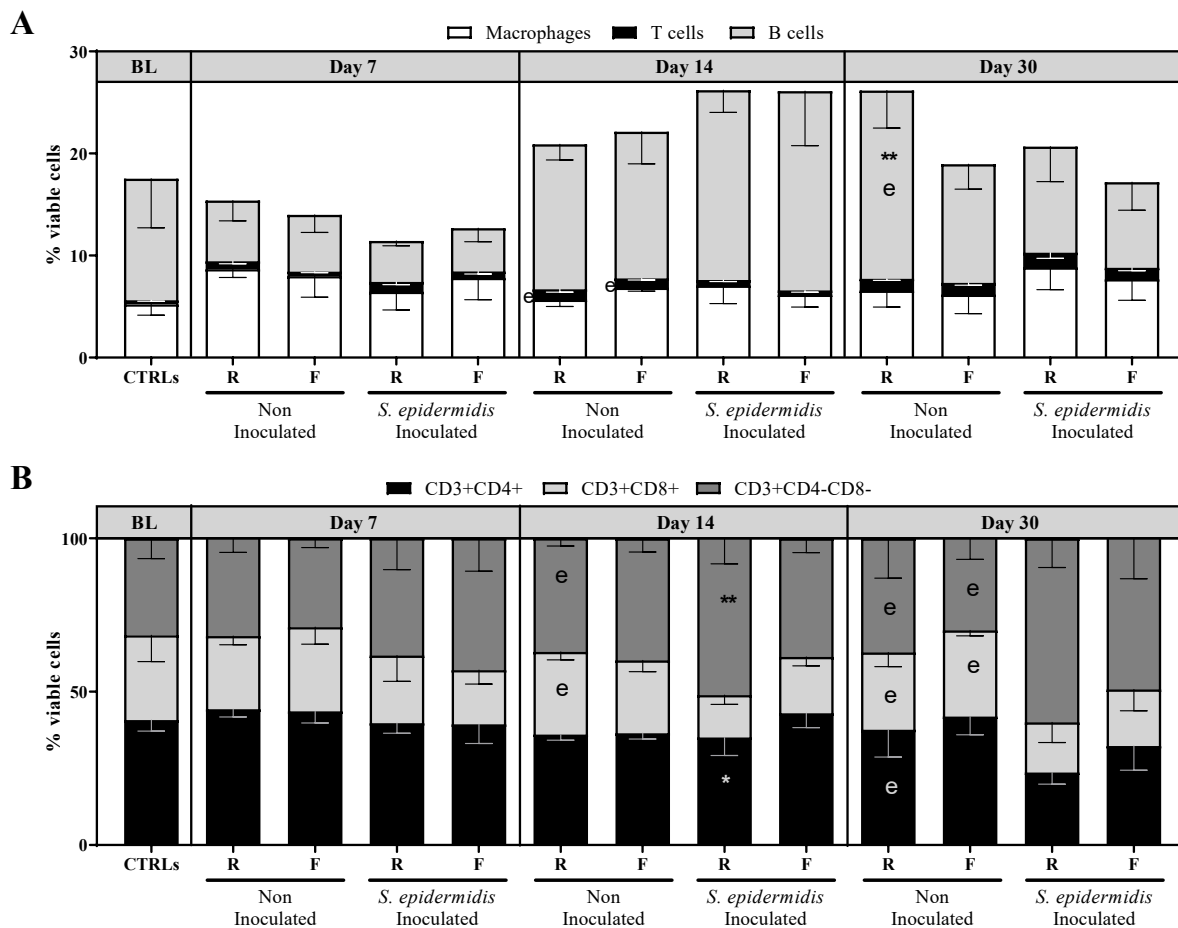

**Fig. S6. Macrophage, T cell and B cell populations observed over time at the fracture site in Balb/C mice.** Upper panel, macrophage lineage cells (Ly6G-F4/80+), T cells (CD3+CD19-) and B lineage cells (CD19+CD3-) as a percentage of total viable cells (A). Lower panel, percentage of CD4+, CD8+ and CD4-CD8- calculated on CD3+ cell numbers (B), in bone single cell suspensions of Balb/C mice at days 7, 14 and 30 post-operatively. Mean values and SD (n=3-8). 2-way ANOVA per time point with Tukey post-hoc correction. Statistics summarize significant differences in the following comparisons: Non-inoculated vs *S. epidermidis* denoted by e); Rigid vs Flexible implant within each condition: \*  $P < 0.05$ ; \*\*  $P < 0.01$ , \*\*\*  $P < 0.001$ . BL: baseline, mean of the control group (non-operated). R: rigid implant; F: flexible implant.

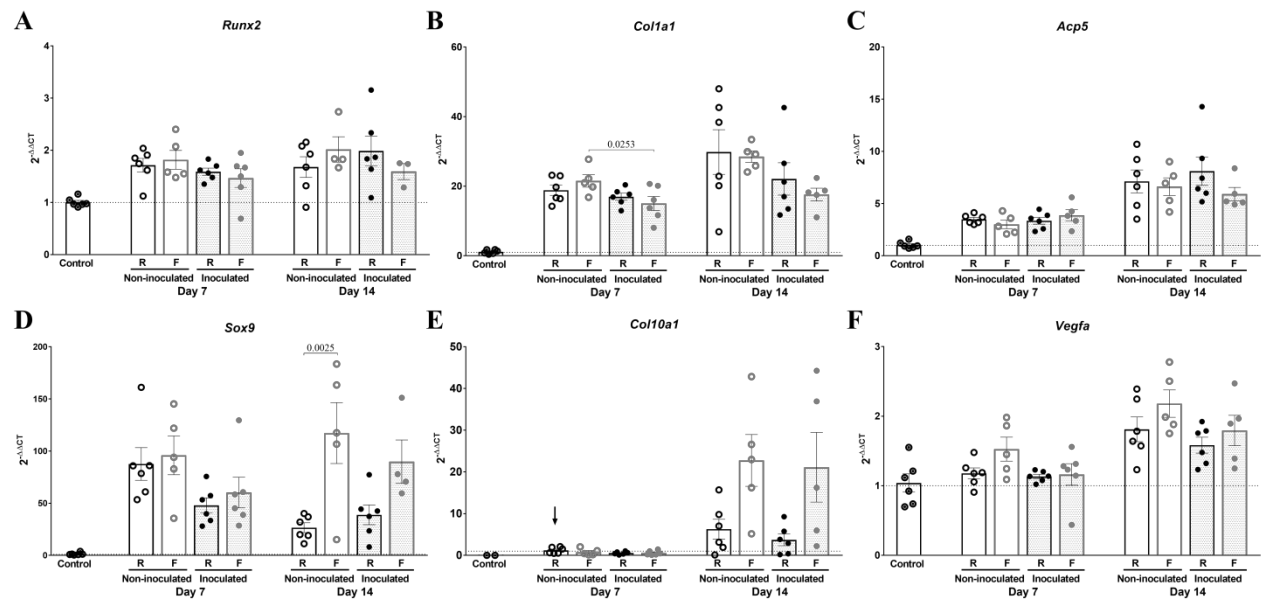

**Fig. S7. mRNA expression in bones of C57BL/6 mice at 7 and 14 days post-op.**  $2^{-\Delta\Delta CT}$  of *Arg1*, *Nos2*, *Ccl2*, *Cd80*, *Il33* and *Hif1a* in RNA isolated from operated and not operated femurs; at 0, 7 and 14 days post op. *18S*, *Eef2* and *Gapdh* used as endogenous controls, control group used as reference group (calibrator). Mean values and SD (n=5-6). 2-way ANOVA per time point, with Sidak's post-hoc test, P-values < 0.05 depicted in figure. R: rigid implant; F: flexible implant.

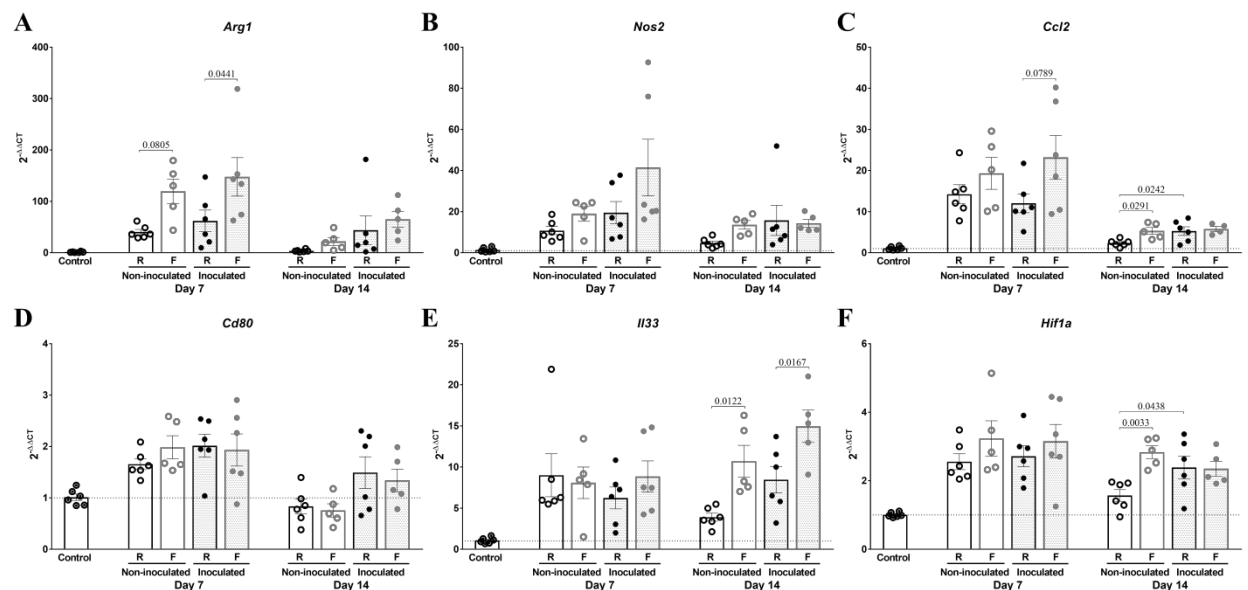

**Fig. S8. mRNA expression in bones of C57BL/6 mice at 7 and 14 days post-op.**  $2^{-\Delta\Delta CT}$  of *Runx2*, *Col1a1*, *Acp5*, *Sox9*, *Col10a1* and *Vegfa* in RNA isolated from operated and not operated femurs; at 0, 7 and 14 days post op. *18S*, *Eef2* and *Gapdh* used as endogenous controls, control group used as reference group (calibrator) except for *Col10a1* where rigid non-inoculated group at day 7 was used as reference due to almost no gene expression in control animals (black arrow). Mean values and SD (n=5-6). 2-way ANOVA per time point, with Sidak's post-hoc test, P-values < 0.05 depicted in figure. R: rigid implant; F: flexible implant.

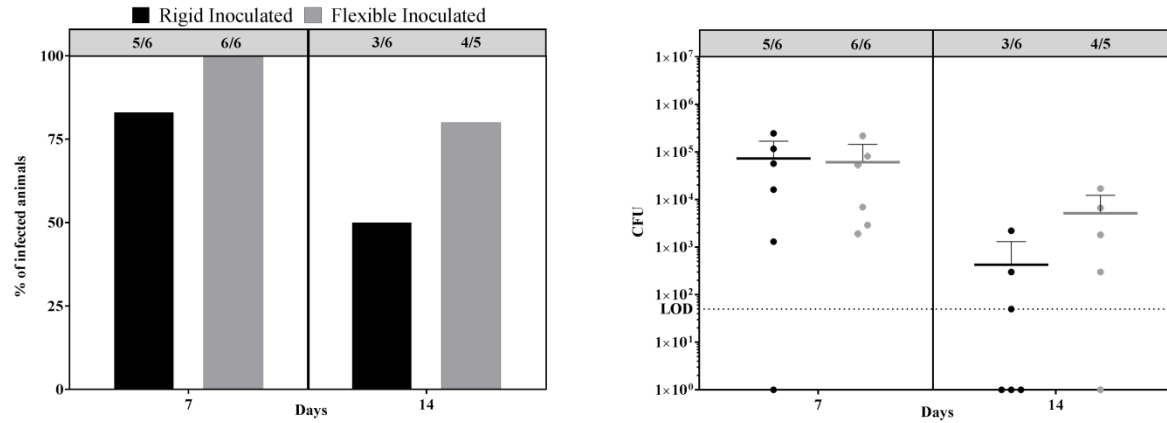

**Fig. S9. Percentage of C57BL/6 mice infected and CFU counts at days 7 and 14 post-op.** Percentage of infected mice (left), and total CFU counts (sum of CFU from soft tissue and implant) (right). Number of culture-positive animals/total number of animals per groups are shown in the upper panel of each graph. Mean values and SD (n=5-6). LOD: Limit of detection,  $0.5 \times 10^2$ , culture negative samples are represented as 1. Fisher's exact test and Mann-Whitney test. No significant differences observed.

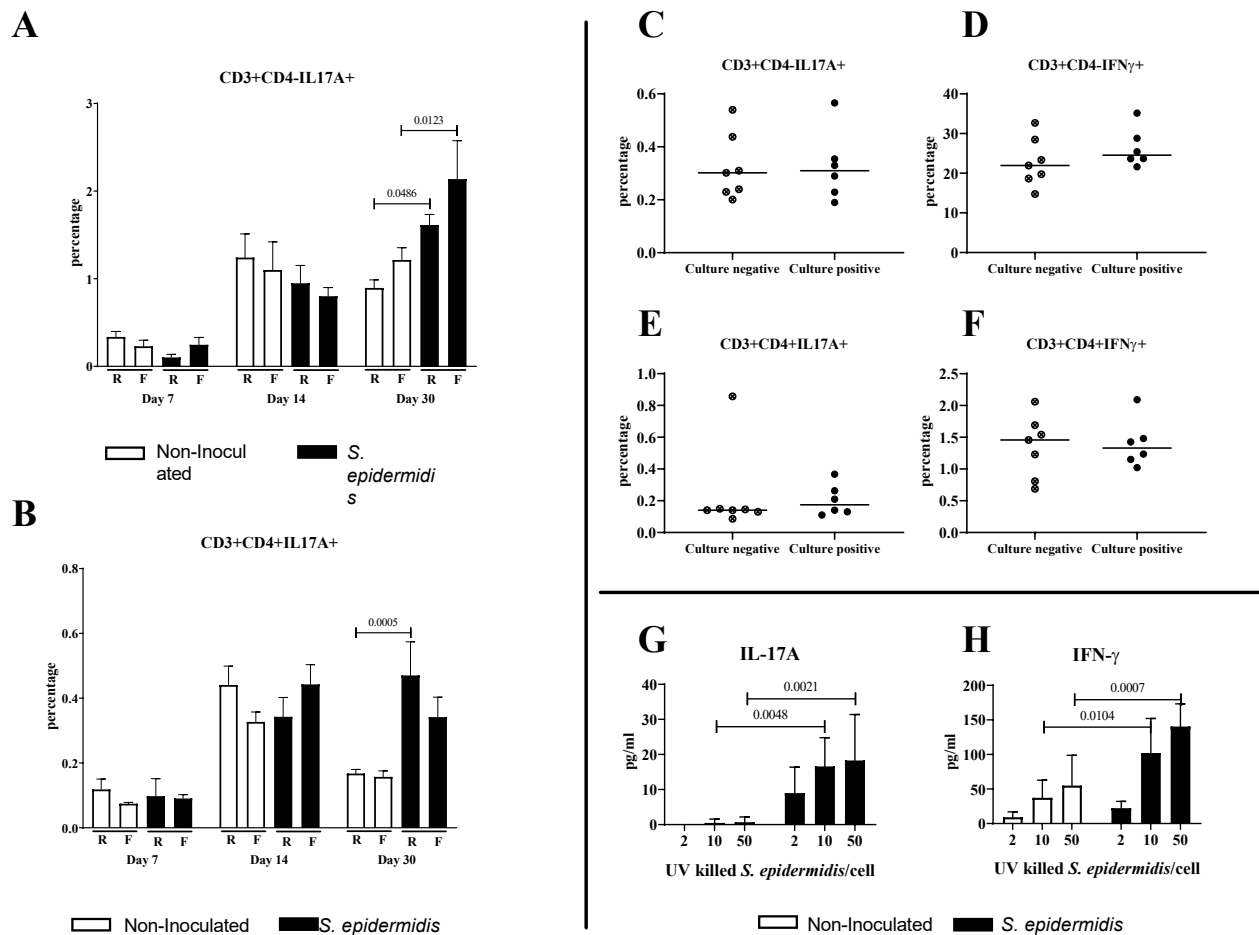

**Fig. S10. Systemic immune responses associated with infection in Balb/C mice.** A-B) Percentages of CD3+CD4-IL-17A+ and CD3+CD4+IL-17A+ T cells in popliteal lymph node single cell suspensions, for both rigid (R) and flexible (F) plate groups. Data shown are Mean+SD (n=4-8). Two-way ANOVA with Tukey post-hoc correction per time-point. C-F) Percentage of IL-17A+ and IFN- $\gamma$ + T lymphocytes in popliteal lymph nodes at day 14 in culture-negative mice (infection cleared) or culture-positive mice (infected). Both rigid and flexible samples grouped together (n=6-7). Mann-Whitney test. G) IL-17A and H) IFN- $\gamma$  production by splenocytes from non-inoculated and *S. epidermidis* inoculated BALB/c mice at day 30 (rigid and flexible samples grouped together) after stimulation with UV-killed *S. epidermidis* *in vitro* (dose indicated in the x-axis: ratio of bacteria per spleen cell). Data shown are Mean+SD (n=5-6). 2-way ANOVA with Sidak post-hoc correction.



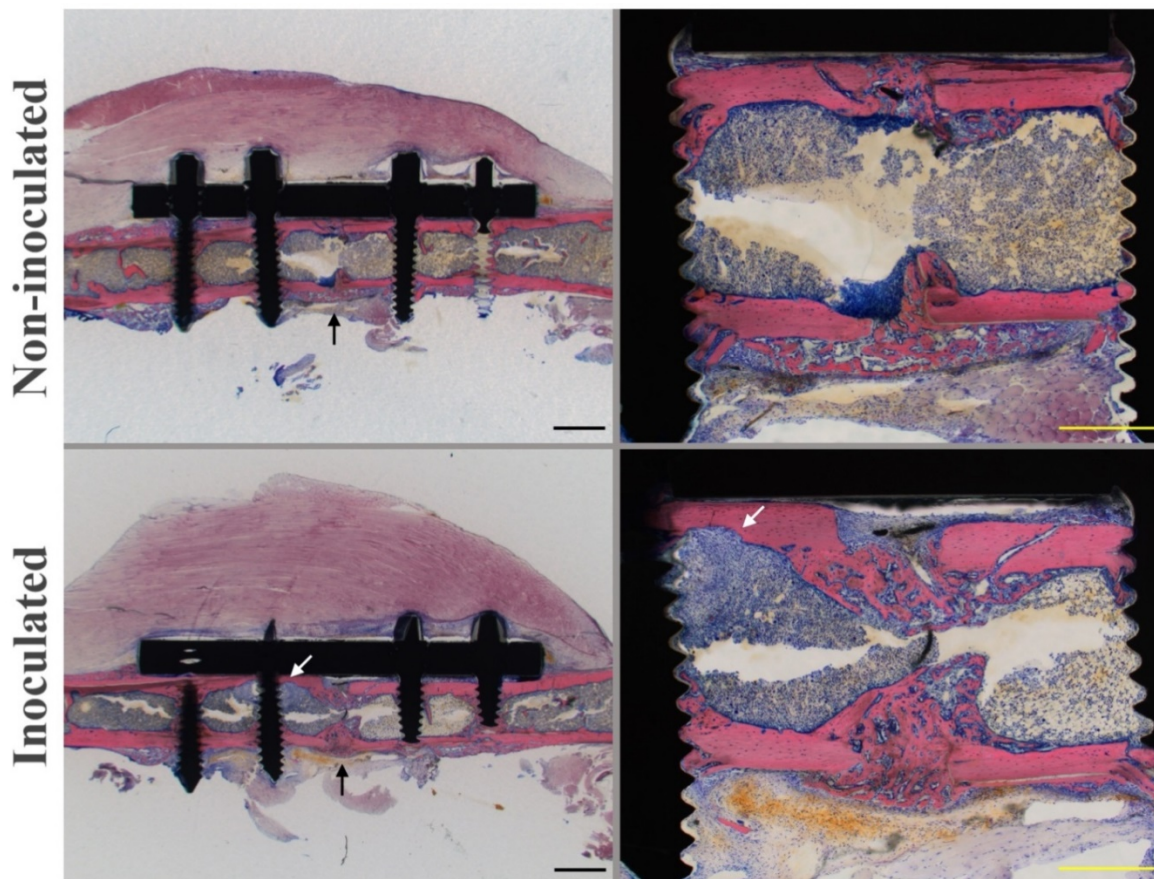

**Fig. S11. Light microscopic images of Giemsa/Eosin stained MMA sections of C57BL/6 IL-17A KO mice non-inoculated and *S. epidermidis* inoculated at day 14.** Scale bar overview images: 1000  $\mu\text{m}$ . Scale osteotomy magnification: 500  $\mu\text{m}$ . The osteotomy gap was filled with new bone in both groups (black arrows). *S. epidermidis* inoculated mice only showed localized signs of infection as osteolytic regions around the screws with granulocyte infiltrate (white arrows). Similar observations were done when comparing with WT non-inoculated and *S. epidermidis* inoculated from previous data (Sabaté Brescó et al., 2017b). Histology sections were generated as previously described (Sabaté Brescó et al., 2017b)

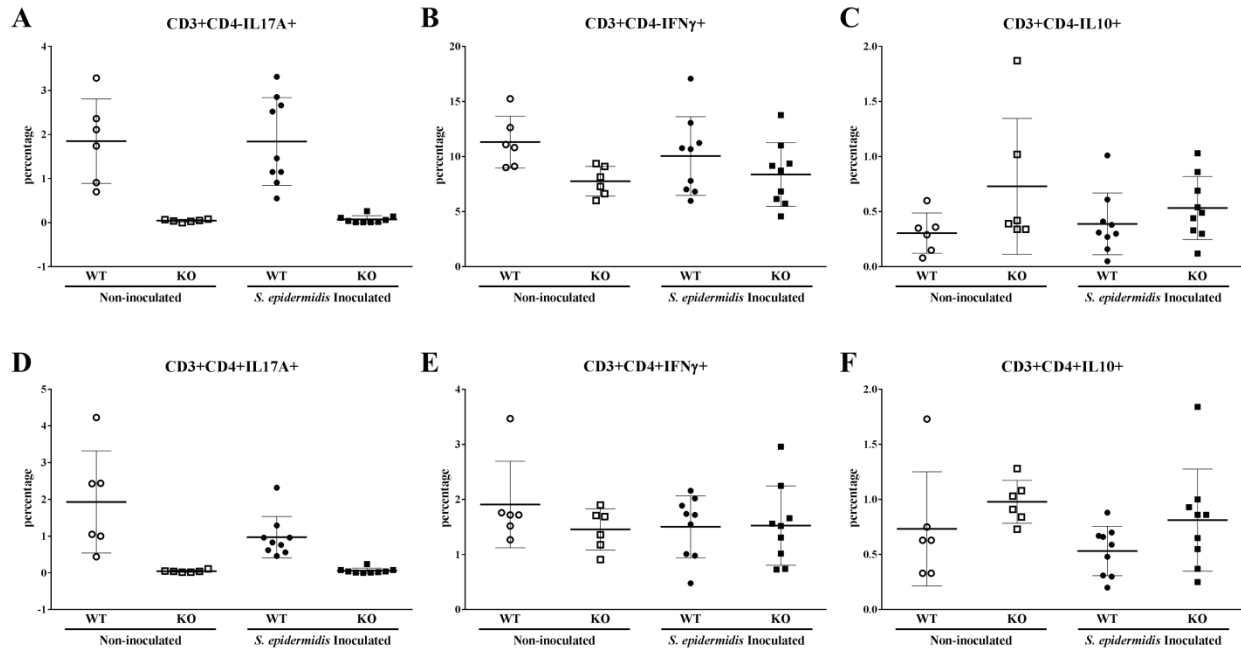

**Fig. S12. Percentage of IL-17A, IFN- $\gamma$  and IL-10 producing T cells in popliteal lymph node of non-inoculated and *S. epidermidis* inoculated C57BL/6 WT and C57BL/6 IL17A KO mice with a rigid implant, 14 days post-op.** Data shown are Mean+SD (n=7-11). 1-way ANOVA with Sidak's post-hoc test or Kruskal-Wallis test with Dunn's post hoc test (no statistics performed for IL-17A populations between WT and KO).

**Table S1.** Study design of the initial study, from which samples were obtained in order to characterize immune responses.

| Group                            | Day 3   |        | Day 7   |        | Day 14  |        | Day 30  |        |
|----------------------------------|---------|--------|---------|--------|---------|--------|---------|--------|
|                                  | C57BL/6 | BALB/c | C57BL/6 | BALB/c | C57BL/6 | BALB/c | C57BL/6 | BALB/c |
| Non-inoculated                   |         |        |         |        |         |        |         |        |
| Rigid                            | ≥ 6     | NA     | ≥ 6     | 4      | ≥ 6     | 4      | ≥ 6     | ≥ 6    |
| Flexible                         | ≥ 6     | NA     | ≥ 6     | ≥ 6    | ≥ 6     | 3      | ≥ 6     | ≥ 6    |
| <i>S. epidermidis</i> Inoculated |         |        |         |        |         |        |         |        |
| Rigid                            | ≥ 6     | NA     | ≥ 6     | 4      | ≥ 6     | ≥ 6    | ≥ 6     | ≥ 6    |
| Flexible                         | ≥ 6     | NA     | 5       | ≥ 6    | ≥ 6     | ≥ 6    | ≥ 6     | ≥ 6    |
| <i>S. aureus</i> Inoculated      |         |        |         |        |         |        |         |        |
| Rigid                            | ≥ 6     | NA     | ≥ 6     | NA     | ≥ 6     | NA     | -       | -      |
| Flexible                         | ≥ 6     | NA     | 5       | NA     | ≥ 6     | NA     | -       | -      |

NA: Not applicable

**Table S2.** Gene expression study design. Final number of animals per group.

| Gene expression study groups (C57BL/6 mice) |              |       |          |        |          |
|---------------------------------------------|--------------|-------|----------|--------|----------|
| Group                                       | Day 0        | Day 7 |          | Day 14 |          |
|                                             | Non-operated | Rigid | Flexible | Rigid  | Flexible |
| Non-inoculated                              | 6            | 6     | 5        | 6      | 5        |
| <i>S. epidermidis</i> inoculated            | -            | 6     | 6        | 6      | 5        |

**Table S3.** IL-17A study design. Final number of animals per group.

| IL-17A study groups (C57BL/6 mice) |              |                |                                  |                |                                  |
|------------------------------------|--------------|----------------|----------------------------------|----------------|----------------------------------|
| Group                              | Day 0        | Day 14         |                                  | Day 30         |                                  |
|                                    | Non-operated | Non-inoculated | <i>S. epidermidis</i> inoculated | Non-inoculated | <i>S. epidermidis</i> inoculated |
| Wild type                          | 4            | 9              | 8                                | -              | 9                                |
| IL-17A KO                          | 3            | 9              | 8                                | -              | 7                                |

**Table S4.** List of genes included in the microfluidic card

| #  | Gene name* (common abbreviation)                                              | Gene symbol*     | Gene ID* | Applied Biosystems® Assay ID | Amplicon Length |
|----|-------------------------------------------------------------------------------|------------------|----------|------------------------------|-----------------|
| 1  | Adhesion G protein-coupled receptor E1 (F4/80)                                | <i>Adgre1</i>    | 13733    | Mm00802529_m1                | 92              |
| 2  | Mannose receptor, C type 1 (CD206)                                            | <i>Mrc1</i>      | 17533    | Mm00485148_m1                | 76              |
| 3  | Arginase, liver (Arg-1)                                                       | <i>Arg1</i>      | 11846    | Mm00475988_m1                | 65              |
| 4  | Nitricoxidesynthase 2, inducible (iNos-2)                                     | <i>Nos2</i>      | 18126    | Mm00440502_m1                | 66              |
| 5  | Elastasa, neutrophilexpressed                                                 | <i>Elane</i>     | 50701    | Mm01168928_g1                | 69              |
| 6  | Tumor necrosis factor (ligand) superfamily, member 11 (RANKL)                 | <i>Tnfsf11</i>   | 21943    | Mm00441906_m1                | 66              |
| 7  | CD80 antigen                                                                  | <i>Cd80</i>      | 12519    | Mm00711660_m1                | 117             |
| 8  | Tumor necrosis factor (TNF- $\alpha$ )                                        | <i>Tnf</i>       | 21926    | Mm00443258_m1                | 81              |
| 9  | Interleukin 4 (IL-4)                                                          | <i>Il4</i>       | 16189    | Mm00445259_m1                | 79              |
| 10 | Interleukin 6 (IL-6)                                                          | <i>Il6</i>       | 16193    | Mm00446190_m1                | 78              |
| 11 | Interleukin 10 (IL-10)                                                        | <i>Il10</i>      | 16153    | Mm00439614_m1                | 79              |
| 12 | Interleukin 17A (IL-17A)                                                      | <i>Il17a</i>     | 16171    | Mm00439618_m1                | 80              |
| 13 | Interleukin 17F (IL-17F)                                                      | <i>Il17f</i>     | 257630   | Mm00521423_m1                | 85              |
| 14 | Interleukin 23, alpha subunit p19 (IL-23)                                     | <i>Il23a</i>     | 83430    | Mm01160011_g1                | 109             |
| 15 | transforming growth factor, beta 1 (TGF-beta1)                                | <i>Tgfb1</i>     | 21803    | Mm01178820_m1                | 59              |
| 16 | transforming growth factor, beta 2 (TGF-beta2)                                | <i>Tgfb2</i>     | 21808    | Mm00436955_m1                | 82              |
| 17 | transforming growth factor, beta 3 (TGF-beta3)                                | <i>Tgfb3</i>     | 21809    | Mm00436960_m1                | 60              |
| 18 | colony stimulating factor 1, macrophage (M-CSF)                               | <i>Csf1</i>      | 12977    | Mm00432686_m1                | 70              |
| 19 | colony stimulating factor 3, granulocyte (G-CSF)                              | <i>Csf3</i>      | 12985    | Mm00438335_g1                | 63              |
| 20 | colony stimulating factor 2, granulocyte-macrophage (GM-CSF)                  | <i>Csf2</i>      | 12981    | Mm01290062_m1                | 125             |
| 21 | Interleukin 33 (IL-33)                                                        | <i>Il33</i>      | 77125    | Mm00505403_m1                | 83              |
| 22 | Chemokine (C-C motif) ligand 2 (CCL2)                                         | <i>Ccl2</i>      | 20296    | Mm00441242_m1                | 74              |
| 23 | chemokine (C-C motif) receptor 2 (CCR2)                                       | <i>Ccr2</i>      | 12772    | Mm01216173_m1                | 88              |
| 24 | Toll-like receptor 2 (TLR-2)                                                  | <i>Tlr2</i>      | 24088    | Mm00442346_m1                | 69              |
| 25 | Toll-like receptor 4 (TLR-4)                                                  | <i>Tlr4</i>      | 21898    | Mm00445273_m1                | 87              |
| 26 | Vascular endothelial growth factor A (VEGF-A)                                 | <i>Vegfa</i>     | 22339    | Mm01281449_m1                | 81              |
| 27 | Hypoxia inducible factor 1, alpha subunit (HIF1- $\alpha$ )                   | <i>Hif1a</i>     | 15251    | Mm00468869_m1                | 75              |
| 28 | Endothelial PAS domain protein 1 (HIF2- $\alpha$ )                            | <i>Epas1</i>     | 13819    | Mm01236112_m1                | 63              |
| 29 | S100 calcium binding protein A8 (S100A8)                                      | <i>S100a8</i>    | 20201    | Mm00496696_g1                | 131             |
| 30 | S100 calcium binding protein A9 (S100A9)                                      | <i>S100a9</i>    | 20202    | Mm00656925_m1                | 162             |
| 31 | High mobility group box 1 (HMGB1)                                             | <i>Hmgb1</i>     | 15289    | Mm00849805_gH                | 158             |
| 32 | Caspase 3                                                                     | <i>Casp3</i>     | 12367    | Mm01195084_m1                | 79              |
| 33 | Selectin, lymphocyte (CD62L)                                                  | <i>Sell</i>      | 20343    | Mm00441291_m1                | 101             |
| 34 | Tumor necrosis factor receptor superfamily, member 11b (osteoprotegerin, OPG) | <i>Tnfrsf11b</i> | 18383    | Mm01205928_m1                | 75              |
| 35 | Secretedphosphoprotein 1 (OPN)                                                | <i>Spp1</i>      | 20750    | Mm00436767_m1                | 114             |
| 36 | Collagen, type I, alpha 1 (ColI $\alpha$ 1)                                   | <i>Col1a1</i>    | 12842    | Mm00801666_g1                | 89              |
| 37 | Collagen, type X, alpha 1 (ColX $\alpha$ 1)                                   | <i>Col10a1</i>   | 12813    | Mm00487041_m1                | 77              |
| 38 | Bridgingintegrator 1 (ALP-1)                                                  | <i>Bin1</i>      | 30948    | Mm00437457_m1                | 72              |
| 39 | Runt related transcription factor 2 (Runx2)                                   | <i>Runx2</i>     | 12393    | Mm00501584_m1                | 91              |
| 40 | Acidphosphatase 5, tartrateresistant (TRAP)                                   | <i>Acp5</i>      | 11433    | Mm00475698_m1                | 79              |
| 41 | SRY (sex determining region Y)-box 9 (Sox9)                                   | <i>Sox9</i>      | 20682    | Mm00448840_m1                | 101             |
| 42 | Eukaryotic translation elongation factor 2 (eEF-2)                            | <i>Eef2</i>      | 13629    | Mm01171434_g1                | 74              |
| 43 | Glyceraldehyde-3-phosphate dehydrogenase (GAPDH)                              | <i>Gapdh</i>     | 14433    | Mm99999915_g1                | 109             |
| 44 | Ribosomal 18S                                                                 | <i>18s</i>       | -        | -                            | -               |

\* Details according to NCBI

**Table S5.** Flow cytometry panels details.

| <b>Product</b>                                  | <b>Clone<br/>(If applicable)</b> | <b>Company</b> |
|-------------------------------------------------|----------------------------------|----------------|
| Fixable Viability Dye eFluor780                 | NA                               | eBioscience    |
| <b>Bone panel</b>                               |                                  |                |
| FITC anti-mouse Ly6G Antibody                   | 1A8                              | Biolegend      |
| PE anti-mouse CD8a Antibody                     | 53-6.7                           | Biolegend      |
| PerCP/Cy5.5 anti-mouse CD19 Antibody            | 6D5                              | Biolegend      |
| PE/Cy7 anti-mouse F4/80 Antibody                | BM8                              | Biolegend      |
| APC anti-mouse CD138 (Syndecan-1) Antibody      | 281-2                            | Biolegend      |
| Pacific Blue anti-mouse CD3 $\epsilon$ Antibody | 145-2C11                         | Biolegend      |
| Brilliant Violet 510 anti-mouse CD4 Antibody    | RM4-5                            | Biolegend      |
| <b>General lymph node panel</b>                 |                                  |                |
| PE/Cy7 anti-mouse CD3 $\epsilon$ Antibody       | 145-2C11                         | Biolegend      |
| Pacific Blue anti-mouse CD4 Antibody            | RM4-5                            | Biolegend      |
| Alexa Fluor 488 anti-mouse/rat IL-17A Antibody  | eBio17B7                         | eBioscience    |
| PE anti-mouse IL-10 Antibody                    | JES5-16E3                        | eBioscience    |
| PerCP-Cy5.5 anti-mouse IFN-gamma Antibody       | XMG1.2                           | eBioscience    |
| APC anti-mouse IL-4 Antibody                    | 11B11                            | eBioscience    |
| <b>IL-17A Bone panel</b>                        |                                  |                |
| PE anti-mouse CD19 Antibody                     | 6D5                              | Biolegend      |
| PE anti-mouse TER-119/Erythroid Cells Antibody  | TER-119                          | Biolegend      |
| PE anti-mouse Ly-6G/Ly-6C (Gr-1) Antibody       | RB6-8C5                          | Biolegend      |
| PE anti-mouse F4/80 Antibody                    | BM8                              | Biolegend      |
| PE anti-mouse/rat CD61 Antibody                 | 2C9.G2 (HM $\beta$ 3-1)          | Biolegend      |
| Alexa Fluor® 700 anti-mouse CD45 Antibody       | 30-F11                           | Biolegend      |
| PerCP/Cy5.5 anti-mouse NK-1.1 Antibody          | PK136                            | Biolegend      |
| PE/Cy7 anti-mouse CD8a Antibody                 | 53-6.7                           | Biolegend      |
| APC Anti-mouse TCR $\gamma/\delta$ Antibody     | GL3                              | Biolegend      |
| Pacific Blue anti-mouse CD3 $\epsilon$ Antibody | 145-2C11                         | Biolegend      |
| Brilliant Violet 510 anti-mouse CD4 Antibody    | RM4-5                            | Biolegend      |
| Alexa Fluor 488 anti-mouse/rat IL-17A Antibody  | eBio17B7                         | eBioscience    |
